# Supplementary figures and images for: Duration and Ice Thickness of a Late Holocene Outlet Glacier Advance near Narsarsuaq, South Greenland
Source: Copernicus journal article supplement (doi:10.5194/egusphere-2023-440), 2023-03-22

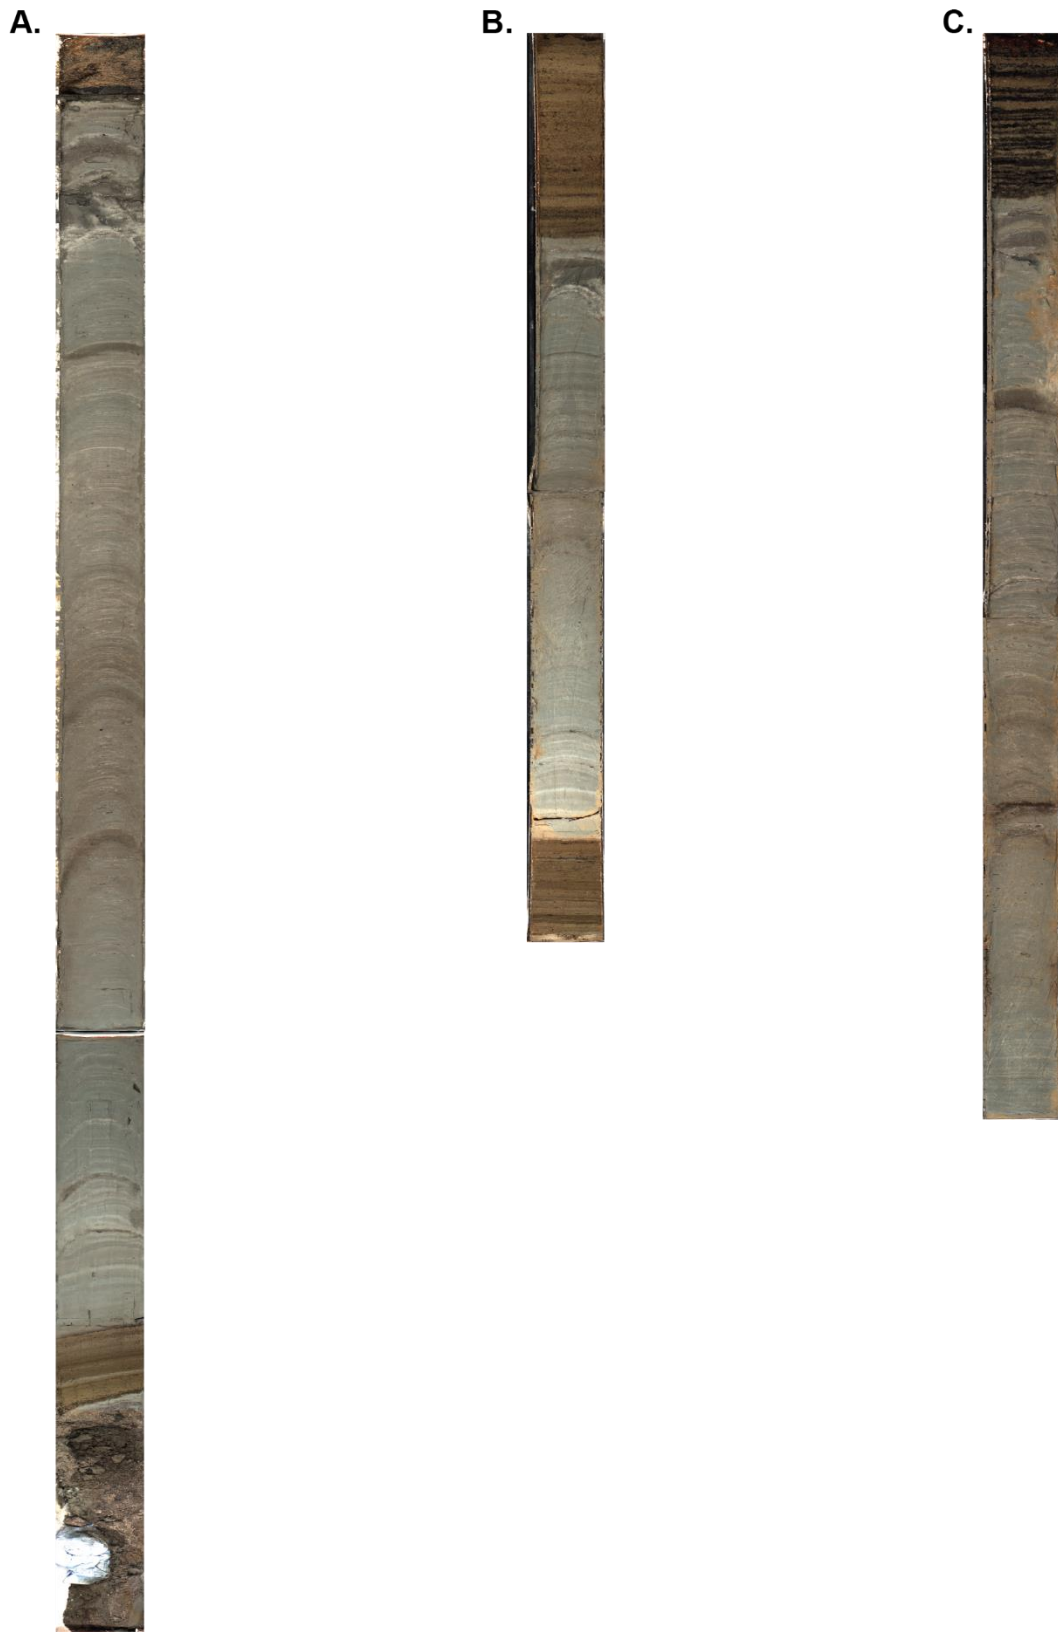

**Figure S1** (A) Image of 19-LMEL-N2. (B) Image of 19-LMEL-U11. (C) Image of 19-LMEL-U5.

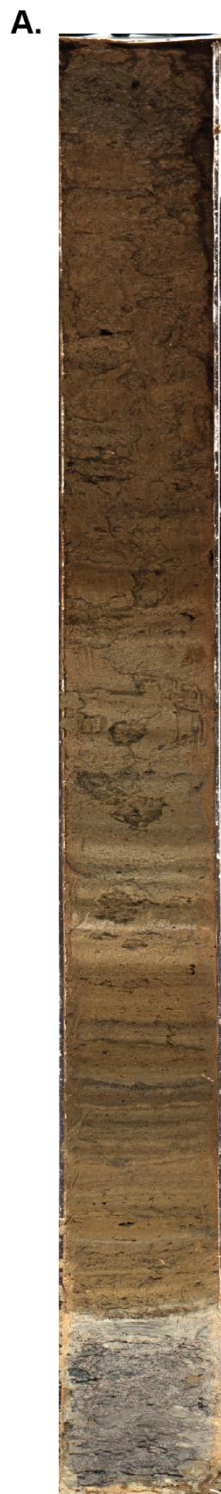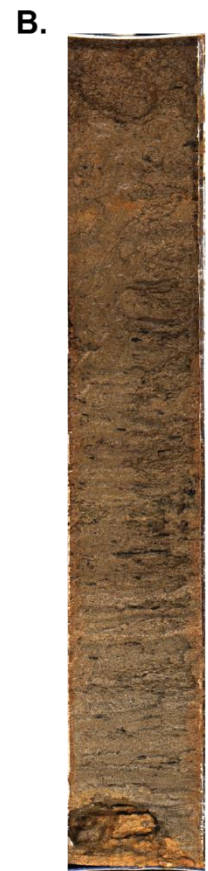

**Figure S2** (A) Image of 19-UMEL-U2. (B) Image of 19-UMEL-U1.

Supplement: Supplementary file 1 [file egusphere-2023-440-supplement.pdf]
